# Supplementary material for: Response inhibition on the stop signal task improves during cardiac contraction
Source: PubMed Central journal article supplement (PMC6002409; doi:10.1038/s41598-018-27513-y), 2018-06-14
Supplement: 41598_2018_27513_MOESM1_ESM.pdf [file 41598_2018_27513_MOESM1_ESM.pdf]

## Response inhibition on the stop signal task improves during cardiac contraction

### SUPPLEMENTARY INFORMATION

Charlotte L Rae\*<sup>1,2</sup>, Vanessa E Botan<sup>1,3</sup>, Cassandra D Gould van Praag<sup>1,2</sup>, Aleksandra M Herman<sup>3</sup>, Jasmina A K Nyysönen<sup>3</sup>, David R Watson<sup>2</sup>, Theodora Duka<sup>3</sup>, Sarah N Garfinkel<sup>1,2,4</sup>, Hugo D Critchley<sup>1,2,4</sup>

<sup>1</sup> Sackler Centre for Consciousness Science, University of Sussex, UK

<sup>2</sup> Department of Neuroscience, Brighton & Sussex Medical School, UK

<sup>3</sup> School of Psychology, University of Sussex, UK

<sup>4</sup> Sussex Partnership NHS Foundation Trust, UK

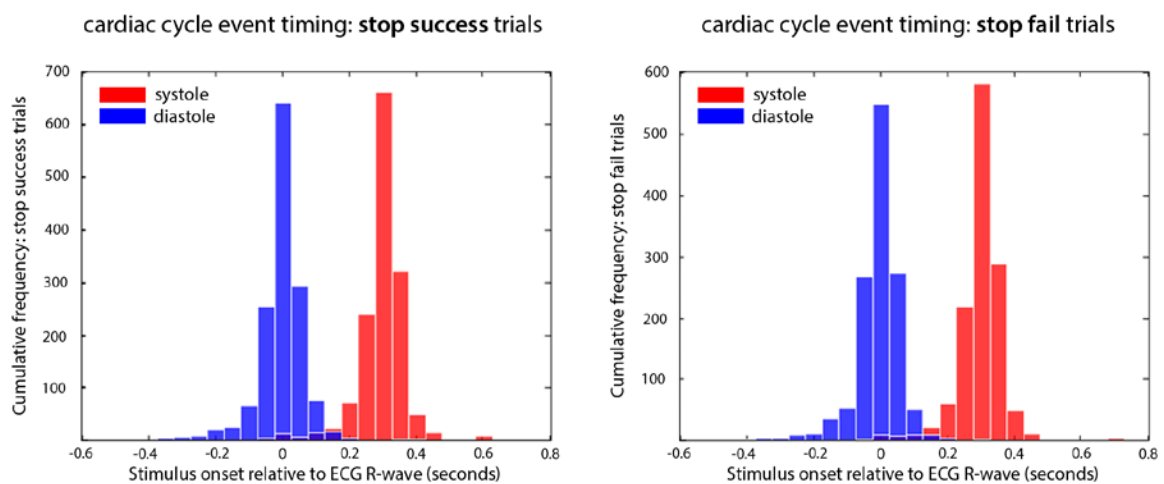

**Supplementary Fig. 1 Cardiac cycle event timing on stop trials.** Left: stop success (response withheld) trials; right: stop fail (button pressed) trials. Trial event timing within the cardiac cycle shown relative to the R-wave peak, in 50ms time bins: for both stop success and stop fail trials, >90% of trials were within 200ms of the intended timing for diastole trials at 10ms prior to the R-wave, and for systole trials at 290ms following R-wave. Dark blue indicates overlap of diastole and systole trial timings (minimal for trials of both stop outcomes).
